# Supplementary material
Source: PubMed Central journal article supplement (PMC5157843)
Supplement: NIHMS800995-supplement.pdf [file NIHMS800995-supplement.pdf]

## **Relationships Between Altered Functional Magnetic Resonance Imaging Activation and Cortical Thickness in Euthymic Bipolar I Disorder**

### ***Supplementary Information***

#### **Supplemental Methods and Materials**

##### **fMRI Paradigm**

Participants were instructed to respond via button box as quickly and accurately as possible with their right index finger to a total of 14 pictures shown during Go or NoGo conditions. In the Go condition (Block A), participants viewed a 2-sec instruction screen “Push for every picture,” followed by the presentation of Spiderman. The Go condition included only the target pictures, Spiderman, presented for 2-sec without an interstimulus interval. In the NoGo condition (Block B), participants were presented with the visual 2-sec instruction “Push only when you see Spiderman,” whereby a non-target non-Spiderman picture (2-sec) was shown seven times, and a Spiderman picture (2-sec) was shown seven times in a pseudorandom sequence. The task included 4 30-sec “Go” blocks and 4 30-sec “No-Go” blocks, which were composed of a total of 112 trials (84 Go trials, 28 NoGo trials). Prior to scanning, participants completed a brief practice session to ensure understanding of the task.

## Supplemental Results

**Table S1.** P-values (uncorrected) showing cortical ROI thickness differences between healthy controls and bipolar patients for the left hemisphere when controlling for age. The ROIs with significant p-values (uncorrected) are shown in red.

| No. | Cortical ROI                         | Thickness P-value |
|-----|--------------------------------------|-------------------|
| 1   | Bank of the Superior Temporal Sulcus | 0.06857           |
| 2   | Caudate Anterior Cingulate           | 0.4438            |
| 3   | Caudal Middle Frontal                | 0.0239            |
| 4   | Cuneus                               | 0.02881           |
| 5   | Entorhinal                           | 0.5437            |
| 6   | Fusiform                             | 0.07268           |
| 7   | Inferior Parietal                    | 0.6136            |
| 8   | Inferior Temporal                    | 0.5844            |
| 9   | Isthmus Cingulate                    | 0.1238            |
| 10  | Lateral Occipital                    | 0.05613           |
| 11  | Lateral Orbitofrontal                | 0.7359            |
| 12  | Lingual                              | 0.035             |
| 13  | Medial Orbitofrontal                 | 0.5387            |
| 14  | Middle Temporal                      | 0.236             |
| 15  | Parahippocampal                      | 0.8357            |
| 16  | Paracentral                          | 0.04455           |
| 17  | Pars Opercularis                     | 0.02876           |
| 18  | Pars Orbitalis                       | 0.7301            |
| 19  | Pars Triangularis                    | 0.03759           |
| 20  | Pericalcarine                        | 0.1053            |
| 21  | Postcentral                          | 0.00583           |
| 22  | Posterior Cingulate                  | 0.6543            |
| 23  | Precentral                           | 0.00248           |
| 24  | Precuneus                            | 0.06995           |
| 25  | Rostral Anterior Cingulate           | 0.4606            |
| 26  | Rostral Middle Frontal               | 0.2034            |

|    |                     |          |
|----|---------------------|----------|
| 27 | Superior Frontal    | 0.1604   |
| 28 | Superior Parietal   | 0.6056   |
| 29 | Superior Temporal   | 0.004507 |
| 30 | Supra Marginal      | 0.1298   |
| 31 | Frontal Pole        | 0.2353   |
| 32 | Temporal Pole       | 0.8414   |
| 33 | Transverse Temporal | 0.08992  |
| 34 | Insula              | 0.7857   |

**Table S2.** P-values (uncorrected) showing cortical ROI thickness differences between healthy controls and bipolar patients for the right hemisphere when controlling for age. The ROIs with significant p-values (uncorrected) are shown in red.

| No. | Cortical ROI                         | Thickness P-value |
|-----|--------------------------------------|-------------------|
| 1   | Bank of the Superior Temporal Sulcus | 0.02907           |
| 2   | Caudate Anterior Cingulate           | 0.03157           |
| 3   | Caudal Middle Frontal                | 0.0354            |
| 4   | Cuneus                               | 0.01898           |
| 5   | Entorhinal                           | 0.6141            |
| 6   | Fusiform                             | 0.005265          |
| 7   | Inferior Parietal                    | 0.3378            |
| 8   | Inferior Temporal                    | 0.4768            |
| 9   | Isthmus Cingulate                    | 0.02333           |
| 10  | Lateral Occipital                    | 0.05964           |
| 11  | Lateral Orbitofrontal                | 0.5576            |
| 12  | Lingual                              | 0.001276          |
| 13  | Medial Orbitofrontal                 | 0.6034            |
| 14  | Middle Temporal                      | 0.1724            |
| 15  | Parahippocampal                      | 0.1738            |
| 16  | Paracentral                          | 0.02553           |
| 17  | Pars Opercularis                     | 0.775             |
| 18  | Pars Orbitalis                       | 0.9076            |
| 19  | Pars Triangularis                    | 0.1581            |

|    |                            |          |
|----|----------------------------|----------|
| 20 | Pericalcarine              | 0.04414  |
| 21 | Postcentral                | 0.008169 |
| 22 | Posterior Cingulate        | 0.08203  |
| 23 | Precentral                 | 0.02762  |
| 24 | Precuneus                  | 0.02941  |
| 25 | Rostral Anterior Cingulate | 0.634    |
| 26 | Rostral Middle Frontal     | 0.1372   |
| 27 | Superior Frontal           | 0.009544 |
| 28 | Superior Parietal          | 0.274    |
| 29 | Superior Temporal          | 0.03733  |
| 30 | Supra Marginal             | 0.05579  |
| 31 | Frontal Pole               | 0.2676   |
| 32 | Temporal Pole              | 0.6076   |
| 33 | Transverse Temporal        | 0.1167   |
| 34 | Insula                     | 0.2864   |

We tested for interaction effects of disease state on functional activations as a predictor for the cortical ROI thickness. Functional activations were resampled after cortical surface registration to the Desikan atlas. For the purpose of statistical analysis, the ROI activations were obtained after averaging their contribution for each cortical ROI from the Desikan atlas. Cortical thickness was also averaged for all the cortical ROIs from the Desikan atlas. The full interaction model included ROI cortical thickness as outcome, and additive effects of functional activations, disease state and age along with activation by state interaction as predictors. The null model was the same but excluded the interaction term. Significance of the interaction effect was determined by a F-test between the full model and the null model that was identical to the full model, but excluded the interaction term.

**Table S3.** P-values (uncorrected) for significant interaction effects of disease state by ROI wise functional activations as predictors of ROI wise cortical thickness.

| No. | Cortical ROI                | P-value of Interaction |
|-----|-----------------------------|------------------------|
| 1   | Left Isthmus Cingulate      | 0.043                  |
| 2   | Left Medial Orbitofrontal   | 0.042                  |
| 3   | Left Rostral Middle Frontal | 0.045                  |
| 4   | Right Pars Triangularis     | 0.046                  |
| 5   | Left Frontal Lobe           | 0.018                  |

**Table S4.** P-values (uncorrected) for significant correlations of ROI thickness with illness duration or period in euthymic state when controlling for age.

| No. | Cortical ROI              | Clinical Variable | Correlation (P-value) |
|-----|---------------------------|-------------------|-----------------------|
| 1   | Left Middle Temporal      | Illness Duration  | 0.3085456 (0.03919)   |
| 2   | Right Transverse Temporal | Illness Duration  | -0.3075999 (0.03983)  |
| 3   | Right Parahippocampal     | Euthymic Duration | 0.3067155 (0.04043)   |
| 4   | Right Posterior Cingulate | Euthymic Duration | 0.3248553 (0.02946)   |

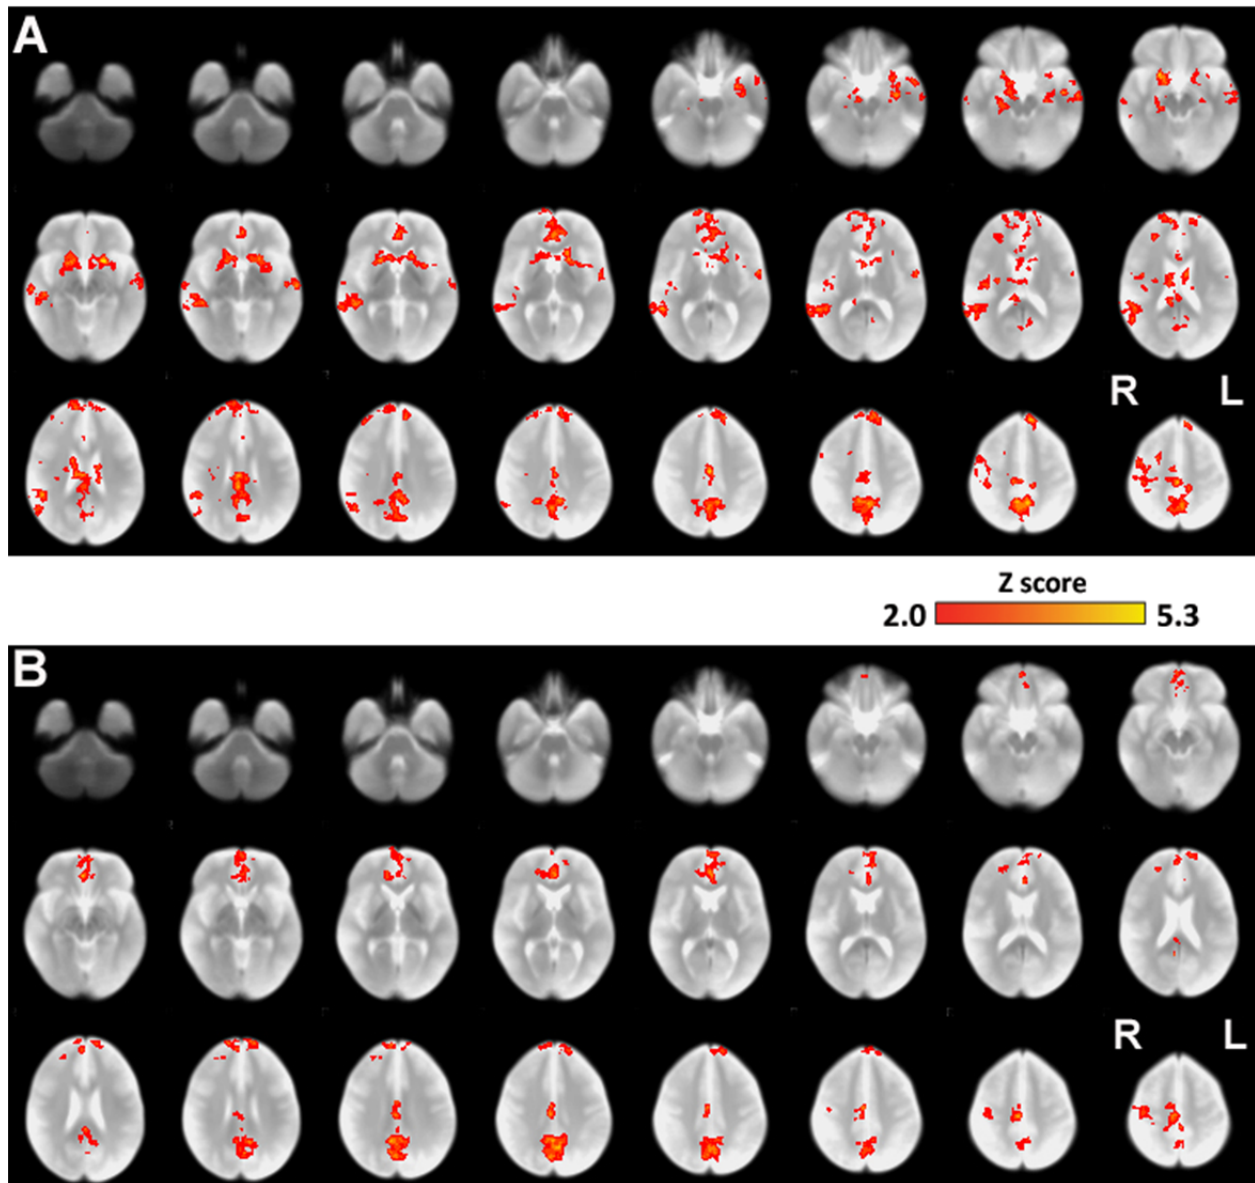

**Figure S1.** Within-group whole-brain results for control (A) and bipolar subjects (B) during response inhibition (NoGo minus Go) contrast of Go-NoGo fMRI paradigm ( $Z > 2.0$ ,  $p < 0.05$  corrected). R= Right; L = Left.

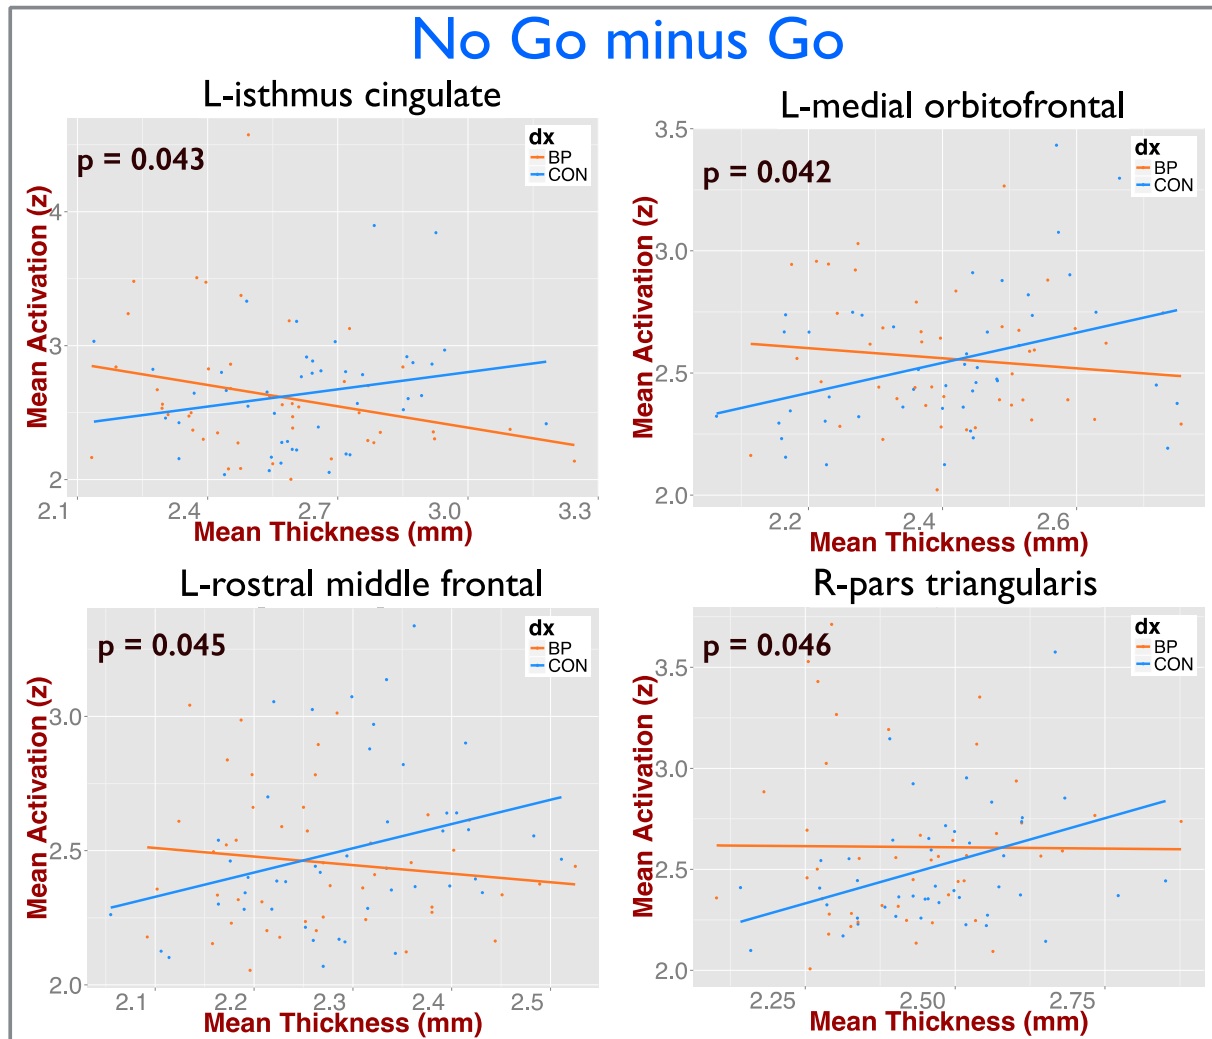

**Figure S2. Interaction plots for fMRI activations by disease state as predictors for cortical thickness.** Significant interaction effects were found in the left isthmus cingulate, left medial orbitofrontal cortex, left rostral middle frontal cortex and the right pars triangularis. L=Left; R=Right; BP=Bipolar; CON=Controls.

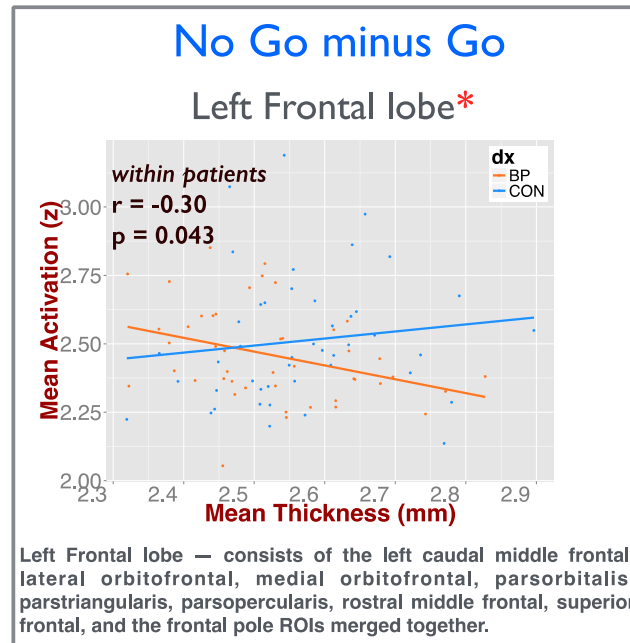

**Figure S3. Interaction plot for fMRI activation by disease state as a predictor for cortical thickness in the left frontal lobe.** Significant interaction effects were observed in the left frontal lobe that consists of the left caudal middle frontal, lateral orbitofrontal, medial orbitofrontal, pars orbitalis, pars triangularis, pars opercularis, rostral middle frontal, superior frontal, and the frontal pole ROIs merged together. It was also observed that the left frontal lobe mean activations were significantly negatively correlated ( $r = -0.26$ ,  $p = 0.043$ ) with the respective mean cortical thickness in patients but not in controls.
